# Supplementary material for: Prediction Models for Public Health Containment Measures on COVID-19 Using Artificial Intelligence and Machine Learning: A Systematic Review
Source: MDPI journal article supplement (doi:10.3390/ijerph18094499), 2021-04-23
Supplement: s1 [file s1]

Table S1. Search strings of databases

| N  | SCOPUS                                | SEARCH STRING                                                                                                                                                                                                                                                                                                                                                                                                                                                                                                                                                                                                                                                                                                                                                                                                                                                                                                                                                                                                                                                                          | RESULTS   |
|----|---------------------------------------|----------------------------------------------------------------------------------------------------------------------------------------------------------------------------------------------------------------------------------------------------------------------------------------------------------------------------------------------------------------------------------------------------------------------------------------------------------------------------------------------------------------------------------------------------------------------------------------------------------------------------------------------------------------------------------------------------------------------------------------------------------------------------------------------------------------------------------------------------------------------------------------------------------------------------------------------------------------------------------------------------------------------------------------------------------------------------------------|-----------|
| #1 | SEARCH STRING FOR COVID               | TITLE-ABS-KEY ((coronavir* OR (corona W/0 virus W/0 novel) OR HCoV OR nCoV OR covid* OR (corona W/0 infection*) OR (Severe PRE/0 Acute PRE/0 Respiratory PRE/0 Syndrome PRE/0 Coronavirus) OR ((SARS OR MERS) W/0 COV*) OR ((SARS OR MERS) W/0 Coronavir*) OR (Middle PRE/0 East PRE/0 Respiratory PRE/0 Syndrome) OR SARSS))                                                                                                                                                                                                                                                                                                                                                                                                                                                                                                                                                                                                                                                                                                                                                          | 43,786    |
| #2 | SEARCH STRING FOR MODELS              | TITLE-ABS-KEY (((theoretical OR mathematical OR stochastic OR deterministic* OR dynamic) W/0 (model* OR simulat*)) OR (intelligen* W/0 artificial) OR (learning W/0 machine))                                                                                                                                                                                                                                                                                                                                                                                                                                                                                                                                                                                                                                                                                                                                                                                                                                                                                                          | 2,148,857 |
| #3 | #1 AND # 2                            | TITLE-ABS-KEY ((coronavir* OR (corona W/0 virus W/0 novel) OR HCoV OR nCoV OR covid* OR (corona W/0 infection*) OR (Severe PRE/0 Acute PRE/0 Respiratory PRE/0 Syndrome PRE/0 Coronavirus) OR ((SARS OR MERS) W/0 COV*) OR ((SARS OR MERS) W/0 Coronavir*) OR (Middle PRE/0 East PRE/0 Respiratory PRE/0 Syndrome) OR SARSS)) AND (((theoretical OR mathematical OR stochastic OR deterministic* OR dynamic) W/0 (model* OR simulat*))                                                                                                                                                                                                                                                                                                                                                                                                                                                                                                                                                                                                                                                 | 845       |
| #4 | SEARCH STRING FOR PREVENTIVE MEASURES | TITLE-ABS-KEY ((Protective W/0 device*) OR (Face W/0 mask*) OR (Hand W/0 (hygien* OR wash*)) OR ((Respiratory OR Cough) W/0 (etiquette OR hygien*)) OR (Surfac* W/0 object* W/0 clean*) OR UV* OR (ventilation W/0 increas*) OR (humidi* W/0 Modif*) OR (Contact W/0 trac*) OR ((Social OR Patient* OR workplace OR school) W/0 (Isolat* OR Distanc*)) OR ((School* OR workplace* OR border) W/0 (measur* OR clusur*)) OR lockdown OR (lock W/0 down) OR crowding OR ((Entry OR Travel*) W/0 (screen*)) OR (quaratin*) OR (outbreak W/0 (measure* OR containment OR Prevent*)))                                                                                                                                                                                                                                                                                                                                                                                                                                                                                                        | 791,743   |
| #5 | #1 AND # 2 AND # 3                    | TITLE-ABS-KEY ((coronavir* OR (corona W/0 virus W/0 novel) OR HCoV OR nCoV OR covid* OR (corona W/0 infection*) OR (Severe PRE/0 Acute PRE/0 Respiratory PRE/0 Syndrome PRE/0 Coronavirus) OR ((SARS OR MERS) W/0 COV*) OR ((SARS OR MERS) W/0 Coronavir*) OR (Middle PRE/0 East PRE/0 Respiratory PRE/0 Syndrome) OR SARSS)) AND (((theoretical OR mathematical OR stochastic OR deterministic* OR dynamic OR SEIR OR SIR) W/0 (model* OR simulat*)) OR (intelligen* W/0 artificial) OR (learning W/0 machine)) AND ((Protective W/0 device*) OR (Face W/0 mask*) OR (Hand W/0 (hygien* OR wash*)) OR ((Respiratory OR Cough) W/0 (etiquette OR hygien*)) OR (Surfac* W/0 object* W/0 clean*) OR UV* OR (ventilation W/0 increas*) OR (humidi* W/0 Modif*) OR (Contact W/0 trac*) OR ((Social OR Patient* OR workplace OR school) W/0 (Isolat* OR Distanc*)) OR ((School* OR workplace* OR border) W/0 (measur* OR clusur*)) OR lockdown OR (lock W/0 down) OR crowding OR ((Entry OR Travel*) W/0 (screen*)) OR (quaratin*) OR (outbreak W/0 (measure* OR containment OR Prevent*))) | 413       |

| DATABASE               | STRING                                                                                                                                                                                                                                                                                                                                                                                                                                                                                                                                                                                                                                                                                                                                                                                                                                                                                                                                                                                                                                                                                                                                                                                                                                                                                                                                                                                                                                                                                                                                                                                                                                                                                                                                                                                                                                                                                                                                                                                                                                                                                                                                                                                                                                                                                                                                                                                                                                                                                                                                                 | RESULTS |
|------------------------|--------------------------------------------------------------------------------------------------------------------------------------------------------------------------------------------------------------------------------------------------------------------------------------------------------------------------------------------------------------------------------------------------------------------------------------------------------------------------------------------------------------------------------------------------------------------------------------------------------------------------------------------------------------------------------------------------------------------------------------------------------------------------------------------------------------------------------------------------------------------------------------------------------------------------------------------------------------------------------------------------------------------------------------------------------------------------------------------------------------------------------------------------------------------------------------------------------------------------------------------------------------------------------------------------------------------------------------------------------------------------------------------------------------------------------------------------------------------------------------------------------------------------------------------------------------------------------------------------------------------------------------------------------------------------------------------------------------------------------------------------------------------------------------------------------------------------------------------------------------------------------------------------------------------------------------------------------------------------------------------------------------------------------------------------------------------------------------------------------------------------------------------------------------------------------------------------------------------------------------------------------------------------------------------------------------------------------------------------------------------------------------------------------------------------------------------------------------------------------------------------------------------------------------------------------|---------|
| Nursing Reference plus | ("coronavirus" OR "coronavirus infections" OR "coronavirus" OR "corona virus" OR "HCoV" OR "nCov" OR "covid" OR "covid19" OR "Severe Acute Respiratory Syndrome Coronavirus 2" OR "SARS-CoV2" OR "SARS-CoV 2" OR "SARS Coronavirus 2" OR "MERS-CoV")                                                                                                                                                                                                                                                                                                                                                                                                                                                                                                                                                                                                                                                                                                                                                                                                                                                                                                                                                                                                                                                                                                                                                                                                                                                                                                                                                                                                                                                                                                                                                                                                                                                                                                                                                                                                                                                                                                                                                                                                                                                                                                                                                                                                                                                                                                   | 53      |
| Living evidence        | ((((intelligence) OR (machine)) OR ((model) OR (simulat)) AND ((theor) OR (math) OR (stoch) OR (determ) OR (dynamic) OR (SEIR) OR (SIR))) AND ((protective device) OR (Face) OR (Hand) OR (etiquette) OR (humidity) OR (air) OR (ventilation) OR (trac) OR (UV) OR (isolat) OR (distan) OR (school) OR (work) OR (border) OR (measur) OR (clos) OR (lock) OR (crowd) OR (travel) OR (screen) OR (quarant) OR (outbreak prevent) OR (outbreak containment) OR (outbreak prevent)))                                                                                                                                                                                                                                                                                                                                                                                                                                                                                                                                                                                                                                                                                                                                                                                                                                                                                                                                                                                                                                                                                                                                                                                                                                                                                                                                                                                                                                                                                                                                                                                                                                                                                                                                                                                                                                                                                                                                                                                                                                                                      | 1506    |
| Pubmed                 | (((((("Models, Theoretical"[Mesh]) OR ("Models, Statistical"[Mesh])) OR ("Mathematics"[Mesh])) OR ("Mathematical Computing"[Mesh])) OR ("Artificial Intelligence"[Mesh])) OR (((((((((((model*[Title/Abstract]) AND (theoretical[Title/Abstract])) OR ("theoretical model*[Title/Abstract]) OR ("theoretical model*[Title/Abstract]) OR ((model*[Title/Abstract]) AND (theoretical[Title/Abstract])) OR (((mathematical*[Title/Abstract]) AND (model*[Title/Abstract])) OR ("mathematical model*[Title/Abstract])) OR (stochast*[Title/Abstract])) OR (dynamic*[Title/Abstract])) OR (determ*[Title/Abstract])) OR (SEIR[Title/Abstract])) OR (SIR[Title/Abstract])) OR ("machine learn*[Title/Abstract]) OR ("artificial intell*[Title/Abstract]) AND (((((((((((("Hand Hygiene"[Mesh]) OR ("Hand hygiene"[Title/Abstract]) OR ((("Respiratory Hygiene"[Title/Abstract]) OR ("Respiratory etiquette"[Title/Abstract]) OR ("Cough etiquette"[Title/Abstract])) OR ("surface* hygien*[Title/Abstract]) OR ("surface* clean*[Title/Abstract])) OR ((("Ultraviolet Rays"[Mesh]) OR (UV[Title/Abstract])) OR ((("Personal Protective Equipment"[Mesh]) OR ("facemask*[Title/Abstract]) OR ("protective device*[Title/Abstract])) OR (((("Social Distance"[Mesh]) OR ("Social Isolation"[Mesh])) OR ("Patient Isolation"[Mesh])) OR ("Quarantine"[Mesh])) OR (((((((("Social Distanc*[Title/Abstract]) OR ("Social Isolation*[Title/Abstract]) OR ("Patient Isolation"[Title/Abstract]) OR ("crowd*[Title/Abstract]) OR ("Quarantin*[Title/Abstract]) OR ("workplace"[Title/Abstract]) OR (school[Title/Abstract])) OR (((("Travel advice"[Title/Abstract]) OR ("travel screening"[Title/Abstract]) OR ((("entry screening"[Title/Abstract]) OR ("exit screening"[Title/Abstract])) OR ((("travel restriction*[Title/Abstract]) OR ("travel ban"[Title/Abstract])) OR ((("border closure"[Title/Abstract]) OR ("lockdown"[Title/Abstract]) OR ("lock-down"[Title/Abstract])) OR ((("Contact Tracing"[Mesh]) OR ("contact trac*[Title/Abstract])) OR ("Increased Ventilation"[Title/Abstract]) OR ((("policy making"[MeSH Terms]) OR ((("outbreak"[Title/Abstract]) OR ("public health measure*[Title/Abstract])) AND (((("coronavirus"[MH] OR "coronavirus infections"[MH] OR "coronavirus"[TW] OR "corona virus"[TW] OR "HCoV"[TW] OR "nCov"[TW] OR "covid"[TW] OR "covid19"[TW] OR "Severe Acute Respiratory Syndrome Coronavirus 2"[TW] OR "SARS-CoV2"[TW] OR "SARS-CoV 2"[TW] OR "SARS Coronavirus 2"[TW] OR "MERS-CoV"[TW]) AND (2019/1/1:3000[PDAT])) | 778     |

| CINHAL | QUERY                                                                                                                                                                                                                                                                                                                                                                                                                                                                                                                                                                          | RESULTS |
|--------|--------------------------------------------------------------------------------------------------------------------------------------------------------------------------------------------------------------------------------------------------------------------------------------------------------------------------------------------------------------------------------------------------------------------------------------------------------------------------------------------------------------------------------------------------------------------------------|---------|
| S1     | (MH "Coronavirus+")                                                                                                                                                                                                                                                                                                                                                                                                                                                                                                                                                            | 1,078   |
| S2     | (MH "Coronavirus Infections+")                                                                                                                                                                                                                                                                                                                                                                                                                                                                                                                                                 | 4,479   |
| S3     | coronavir* OR "corona virus" OR HCoV OR nCov OR covid* OR "Severe Acute Respiratory Syndrome Coronavirus 2" OR "SARS-CoV2" OR "SARS-CoV 2" OR "SARS Coronavirus 2" OR "MERS-CoV" OR "Middle East Respiratory Syndrome" OR SARSS                                                                                                                                                                                                                                                                                                                                                | 9,369   |
| S4     | S1 OR S2 OR S3                                                                                                                                                                                                                                                                                                                                                                                                                                                                                                                                                                 | 11,127  |
| S5     | (MH "Models, Theoretical+")                                                                                                                                                                                                                                                                                                                                                                                                                                                                                                                                                    | 18097   |
| S6     | (MH "Artificial Intelligence+")                                                                                                                                                                                                                                                                                                                                                                                                                                                                                                                                                | 18,097  |
| S7     | S5 OR S6                                                                                                                                                                                                                                                                                                                                                                                                                                                                                                                                                                       | 197,941 |
| S8     | "models theoretical" OR "theoretical models" OR "mathematical model" OR "mathematical model" OR "Artificial Intelligence"                                                                                                                                                                                                                                                                                                                                                                                                                                                      | 62,131  |
| S9     | S7 OR S8                                                                                                                                                                                                                                                                                                                                                                                                                                                                                                                                                                       | 201,068 |
| S10    | S4 AND S9                                                                                                                                                                                                                                                                                                                                                                                                                                                                                                                                                                      | 175     |
| S11    | (MH "Handwashing+")                                                                                                                                                                                                                                                                                                                                                                                                                                                                                                                                                            | 9,418   |
| S12    | (MH "Protective Devices+")                                                                                                                                                                                                                                                                                                                                                                                                                                                                                                                                                     | 2232    |
| S13    | (MH "Disease Outbreaks/PC")                                                                                                                                                                                                                                                                                                                                                                                                                                                                                                                                                    | 6,497   |
| S14    | (MM "Quarantine")                                                                                                                                                                                                                                                                                                                                                                                                                                                                                                                                                              | 244     |
| S15    | S11 OR S12                                                                                                                                                                                                                                                                                                                                                                                                                                                                                                                                                                     | 30,551  |
| S16    | S13 OR S15                                                                                                                                                                                                                                                                                                                                                                                                                                                                                                                                                                     | 36,746  |
| S17    | S14 OR S16                                                                                                                                                                                                                                                                                                                                                                                                                                                                                                                                                                     | 3692    |
| S18    | Facemask OR "Respiratory etiquette" OR "Respiratory Hygiene" OR "Cough etiquette" OR "Hand hygiene" OR "Surface objects Clean" OR UV OR "Increased Ventilation" OR "Modifying Humidity" OR "Contact tracing" OR "Social Distance" OR "Social Isolation" OR "Patient Isolation" OR "Isolation of sick individual*" OR "School measure*" OR "School Closure" OR "Workplace Isolation" OR "Workplace measure*" OR "Workplace closure" OR "Crowding" OR "Travel Advice" OR "Travel screening" OR "Entry screening" OR "Border Closure" OR "lockdown" OR "lock-down" OR "lock down" | 31,064  |
| S19    | S17 OR S18                                                                                                                                                                                                                                                                                                                                                                                                                                                                                                                                                                     | 61,345  |
| S20    | S10 AND S19                                                                                                                                                                                                                                                                                                                                                                                                                                                                                                                                                                    | 38      |
